# Supplementary material for: Prospective analysis of circulating metabolites and breast cancer in EPIC
Source: PubMed Central journal article supplement (PMC6757362; doi:10.1186/s12916-019-1408-4), 2019-09-24

**Supplementary Table 1. Completeness and exclusions of the different metabolites, with limits of detection (LOD) and limits of quantification (LOQ)**

| Metabolites <sup>1</sup> | Non-quantifiable results <sup>2</sup> |                                      |                      | CV <sup>4</sup> , % |
|--------------------------|---------------------------------------|--------------------------------------|----------------------|---------------------|
|                          | Missing <sup>3</sup> data, %          | Results outside the measurable range |                      |                     |
|                          |                                       | Samples, %                           | Criteria             |                     |
| <b>Acylcarnitines</b>    |                                       |                                      |                      |                     |
| C0                       | 0                                     | 0                                    | <LOD                 | 4.0                 |
| C2                       | 0                                     | 0                                    | <LOD                 | 4.1                 |
| C3                       | 0                                     | 0                                    | <LOD                 | 5.0                 |
| C3-DC (C4-OH)            | 0                                     | 39.04                                | <LOD                 | -                   |
| C4                       | 0                                     | 0.06                                 | <LOD                 | 5.4                 |
| C5                       | 0                                     | 0.77                                 | <LOD                 | 5.4                 |
| C5-DC (C6-OH)            | 0                                     | 90.21                                | <LOD                 | -                   |
| C8                       | 0                                     | 92.43                                | <LOD                 | -                   |
| C10                      | 0                                     | 52.99                                | <LOD                 | -                   |
| C10:1                    | 0                                     | 93.1                                 | <LOD                 | -                   |
| C12                      | 0                                     | 85.01                                | <LOD                 | -                   |
| C12:1                    | 0                                     | 56.34                                | <LOD                 | -                   |
| C14:1                    | 0                                     | 6.13                                 | <LOD                 | 9.2                 |
| C14:2                    | 0                                     | 63.02                                | <LOD                 | -                   |
| C16                      | 0                                     | 0.15                                 | <LOD                 | 5.4                 |
| C16:1                    | 0                                     | 90.73                                | <LOD                 | -                   |
| C18                      | 0                                     | 23.52                                | <LOD                 | -                   |
| C18:1                    | 0                                     | 0.28                                 | <LOD                 | 4.8                 |
| C18:2                    | 0                                     | 22.11                                | <LOD                 | -                   |
| <b>Amino acids</b>       |                                       |                                      |                      |                     |
| Alanine                  | 0                                     | 0                                    | <LOQ (< 20 µmol/L)   | 4.2                 |
| Arginine                 | 0                                     | 0                                    | <LOQ (< 5 µmol/L)    | 5.4                 |
| Asparagine               | 0                                     | 0                                    | <LOQ (< 5 µmol/L)    | 4.0                 |
| Aspartate                | 0                                     | 34.33                                | <LOQ (< 5 µmol/L)    | -                   |
| Citrulline               | 0                                     | 0                                    | <LOQ (< 5 µmol/L)    | 5.9                 |
| Glutamine                | 0                                     | 0                                    | <LOQ (< 20 µmol/L)   | 6.3                 |
| Glutamate                | 0                                     | 0.22                                 | <LOQ (< 10 µmol/L)   | 4.7                 |
| Glycine                  | 0                                     | 0                                    | <LOQ (< 25 µmol/L)   | 6.2                 |
| Histidine                | 0                                     | 0                                    | <LOQ (< 5 µmol/L)    | 5.7                 |
| Isoleucine               | 0                                     | 0                                    | <LOQ (< 5 µmol/L)    | 6.8                 |
| Leucine                  | 0                                     | 0.03                                 | <LOQ (< 50 µmol/L)   | 6.2                 |
| Lysine                   | 0                                     | 0                                    | <LOQ (< 10 µmol/L)   | 8.5                 |
| Methionine               | 0                                     | 0                                    | <LOQ (< 5 µmol/L)    | 8.4                 |
| Ornithine                | 0                                     | 0                                    | <LOQ (< 5 µmol/L)    | 8.2                 |
| Phenylalanine            | 0                                     | 0                                    | <LOQ (< 5 µmol/L)    | 6.0                 |
| Proline                  | 0                                     | 0                                    | <LOQ (< 10 µmol/L)   | 5.5                 |
| Serine                   | 0                                     | 0                                    | <LOQ (< 5 µmol/L)    | 5.6                 |
| Threonine                | 0                                     | 0                                    | <LOQ (< 5 µmol/L)    | 4.2                 |
| Tryptophane              | 0                                     | 0                                    | <LOQ (< 5 µmol/L)    | 6.2                 |
| Tyrosine                 | 0                                     | 0                                    | <LOQ (< 5 µmol/L)    | 5.6                 |
| Valine                   | 0                                     | 0                                    | <LOQ (< 10 µmol/L)   | 5.5                 |
| <b>Biogenic amines</b>   |                                       |                                      |                      |                     |
| ADMA                     | 0                                     | 2.19                                 | <LOQ (< 0.25 µmol/L) | 8.3                 |
| Creatinine               | 0                                     | 0                                    | <LOQ (< 10 µmol/L)   | 3.2                 |
| Kynurenine               | 0                                     | 0.95                                 | <LOQ (< 1 µmol/L)    | 6.5                 |
| Nitro-Tyr                | 0                                     | 98.83                                | <LOQ (< 1 µmol/L)    | -                   |
| Putrescine               | 0                                     | 72.78                                | <LOQ (< 0.1 µmol/L)  | -                   |
| SDMA                     | 0                                     | 0                                    | <LOQ (< 0.1 µmol/L)  | 7.7                 |
| Sarcosine                | 0                                     | 29.65                                | <LOQ (< 1 µmol/L)    | -                   |
| Serotonin                | 0                                     | 76.29                                | <LOQ (< 0.1 µmol/L)  | -                   |
| Spermidine               | 0                                     | 91.72                                | <LOQ (< 0.25 µmol/L) | -                   |
| Spermine                 | 0                                     | 95.72                                | <LOQ (< 0.25 µmol/L) | -                   |

| Metabolites <sup>1</sup>    | Non-quantifiable results <sup>2</sup> |                                      |                     | CV <sup>4</sup> , % |
|-----------------------------|---------------------------------------|--------------------------------------|---------------------|---------------------|
|                             | Missing <sup>3</sup> data, %          | Results outside the measurable range |                     |                     |
|                             |                                       | Samples, %                           | Criteria            |                     |
| Taurine                     | 0                                     | 0                                    | <LOQ (< 2.5 µmol/L) | 3.1                 |
| alpha-AAA                   | 0                                     | 80.23                                | <LOQ (< 1 µmol/L)   | -                   |
| t4-OH-Pro                   | 0                                     | 0                                    | <LOQ (< 2 µmol/L)   | 5.0                 |
| <b>Glycerophospholipids</b> |                                       |                                      |                     |                     |
| PC aa C28:1                 | 0                                     | 0                                    | <LOD                | 4.5                 |
| PC aa C30:0                 | 0                                     | 0                                    | <LOD                | 4.7                 |
| PC aa C32:0                 | 0                                     | 0                                    | <LOD                | 5.1                 |
| PC aa C32:1                 | 0                                     | 0                                    | <LOD                | 5.5                 |
| PC aa C32:2                 | 0                                     | 0                                    | <LOD                | 6.0                 |
| PC aa C32:3                 | 0                                     | 0                                    | <LOD                | 5.5                 |
| PC aa C34:1                 | 0                                     | 0                                    | <LOD                | 5.3                 |
| PC aa C34:2                 | 0                                     | 0                                    | <LOD                | 6.3                 |
| PC aa C34:3                 | 0                                     | 0                                    | <LOD                | 5.1                 |
| PC aa C34:4                 | 0                                     | 0                                    | <LOD                | 5.4                 |
| PC aa C36:0                 | 0                                     | 0.06                                 | <LOD                | 6.6                 |
| PC aa C36:1                 | 0                                     | 0                                    | <LOD                | 4.6                 |
| PC aa C36:2                 | 0                                     | 0                                    | <LOD                | 4.5                 |
| PC aa C36:3                 | 0                                     | 0                                    | <LOD                | 4.4                 |
| PC aa C36:4                 | 0                                     | 0                                    | <LOD                | 4.4                 |
| PC aa C36:5                 | 0                                     | 0                                    | <LOD                | 4.7                 |
| PC aa C36:6                 | 0                                     | 0                                    | <LOD                | 5.3                 |
| PC aa C38:0                 | 0                                     | 0                                    | <LOD                | 4.5                 |
| PC aa C38:3                 | 0                                     | 0                                    | <LOD                | 3.9                 |
| PC aa C38:4                 | 0                                     | 0                                    | <LOD                | 4.0                 |
| PC aa C38:5                 | 0                                     | 0                                    | <LOD                | 4.1                 |
| PC aa C38:6                 | 0                                     | 0                                    | <LOD                | 4.0                 |
| PC aa C40:1                 | 0                                     | 69.77                                | <LOD                | -                   |
| PC aa C40:2                 | 0                                     | 0                                    | <LOD                | 7.2                 |
| PC aa C40:3                 | 0                                     | 0                                    | <LOD                | 5.6                 |
| PC aa C40:4                 | 0                                     | 0                                    | <LOD                | 4.1                 |
| PC aa C40:5                 | 0                                     | 0                                    | <LOD                | 4.3                 |
| PC aa C40:6                 | 0                                     | 0                                    | <LOD                | 4.0                 |
| PC aa C42:0                 | 0                                     | 0                                    | <LOD                | 5.3                 |
| PC aa C42:1                 | 0                                     | 0                                    | <LOD                | 5.7                 |
| PC aa C42:2                 | 0                                     | 0.03                                 | <LOD                | 4.5                 |
| PC aa C42:4                 | 0                                     | 0                                    | <LOD                | 6.7                 |
| PC aa C42:5                 | 0                                     | 0                                    | <LOD                | 5.7                 |
| PC aa C42:6                 | 0                                     | 0                                    | <LOD                | 5.3                 |
| PC ae C30:0                 | 0                                     | 0                                    | <LOD                | 5.8                 |
| PC ae C30:2                 | 0                                     | 0                                    | <LOD                | 7.9                 |
| PC ae C32:1                 | 0                                     | 0                                    | <LOD                | 5.3                 |
| PC ae C32:2                 | 0                                     | 0                                    | <LOD                | 5.5                 |
| PC ae C34:0                 | 0                                     | 0                                    | <LOD                | 5.6                 |
| PC ae C34:1                 | 0                                     | 0                                    | <LOD                | 5.1                 |
| PC ae C34:2                 | 0                                     | 0                                    | <LOD                | 5.3                 |
| PC ae C34:3                 | 0                                     | 0                                    | <LOD                | 5.1                 |
| PC ae C36:0                 | 0                                     | 0                                    | <LOD                | 6.2                 |
| PC ae C36:1                 | 0                                     | 0                                    | <LOD                | 4.7                 |
| PC ae C36:2                 | 0                                     | 0                                    | <LOD                | 4.8                 |
| PC ae C36:3                 | 0                                     | 0                                    | <LOD                | 4.7                 |
| PC ae C36:4                 | 0                                     | 0                                    | <LOD                | 5.0                 |
| PC ae C36:5                 | 0                                     | 0                                    | <LOD                | 4.9                 |
| PC ae C38:0                 | 0                                     | 0                                    | <LOD                | 4.4                 |
| PC ae C38:2                 | 0                                     | 0                                    | <LOD                | 6.4                 |
| PC ae C38:3                 | 0                                     | 0                                    | <LOD                | 4.3                 |
| PC ae C38:4                 | 0                                     | 0                                    | <LOD                | 4.3                 |

| Metabolites <sup>1</sup> | Non-quantifiable results <sup>2</sup> |                                      |                      | CV <sup>4</sup> , % |
|--------------------------|---------------------------------------|--------------------------------------|----------------------|---------------------|
|                          | Missing <sup>3</sup> data, %          | Results outside the measurable range |                      |                     |
|                          |                                       | Samples, %                           | Criteria             |                     |
| PC ae C38:5              | 0                                     | 0                                    | <LOD                 | 5.1                 |
| PC ae C38:6              | 0                                     | 0                                    | <LOD                 | 4.7                 |
| PC ae C40:1              | 0                                     | 0                                    | <LOD                 | 5.5                 |
| PC ae C40:2              | 0                                     | 0                                    | <LOD                 | 4.2                 |
| PC ae C40:3              | 0                                     | 0                                    | <LOD                 | 4.1                 |
| PC ae C40:4              | 0                                     | 0                                    | <LOD                 | 4.4                 |
| PC ae C40:5              | 0                                     | 0                                    | <LOD                 | 4.2                 |
| PC ae C40:6              | 0                                     | 0                                    | <LOD                 | 4.3                 |
| PC ae C42:1              | 0                                     | 0.09                                 | <LOD                 | 6.0                 |
| PC ae C42:2              | 0                                     | 0                                    | <LOD                 | 5.5                 |
| PC ae C42:3              | 0                                     | 0                                    | <LOD                 | 5.7                 |
| PC ae C42:4              | 0                                     | 0                                    | <LOD                 | 5.3                 |
| PC ae C42:5              | 0                                     | 0                                    | <LOD                 | 3.6                 |
| PC ae C44:3              | 0                                     | 0                                    | <LOD                 | 9.5                 |
| PC ae C44:4              | 0                                     | 0.03                                 | <LOD                 | 7.3                 |
| PC ae C44:5              | 0                                     | 0                                    | <LOD                 | 4.8                 |
| PC ae C44:6              | 0                                     | 0                                    | <LOD                 | 4.9                 |
| lysoPC a C16:0           | 0                                     | 0                                    | <LOD                 | 6.4                 |
| lysoPC a C16:1           | 0                                     | 0                                    | <LOD                 | 6.4                 |
| lysoPC a C17:0           | 0                                     | 0                                    | <LOD                 | 6.7                 |
| lysoPC a C18:0           | 0                                     | 0                                    | <LOD                 | 6.4                 |
| lysoPC a C18:1           | 0                                     | 0                                    | <LOD                 | 6.5                 |
| lysoPC a C18:2           | 0                                     | 0                                    | <LOD                 | 6.3                 |
| lysoPC a C20:3           | 0                                     | 0                                    | <LOD                 | 6.0                 |
| lysoPC a C20:4           | 0                                     | 0                                    | <LOD                 | 5.8                 |
| lysoPC a C24:0           | 0                                     | 0                                    | <LOD                 | 13.5                |
| lysoPC a C28:1           | 0                                     | 0                                    | <LOD                 | 11.7                |
| <b>Sphingolipids</b>     |                                       |                                      |                      |                     |
| SM C16:0                 | 0                                     | 0                                    | <LOD                 | 5.2                 |
| SM C16:1                 | 0                                     | 0                                    | <LOD                 | 5.3                 |
| SM C18:0                 | 0                                     | 0                                    | <LOD                 | 5.1                 |
| SM C18:1                 | 0                                     | 0                                    | <LOD                 | 5.0                 |
| SM C20:2                 | 0                                     | 0                                    | <LOD                 | 8.0                 |
| SM C24:0                 | 0                                     | 0                                    | <LOD                 | 5.5                 |
| SM C24:1                 | 0                                     | 0                                    | <LOD                 | 4.8                 |
| SM C26:0                 | 0                                     | 0                                    | <LOD                 | 9.8                 |
| SM C26:1                 | 0                                     | 0                                    | <LOD                 | 7.9                 |
| SM (OH) C14:1            | 0                                     | 0                                    | <LOD                 | 5.8                 |
| SM (OH) C16:1            | 0                                     | 0                                    | <LOD                 | 5.1                 |
| SM (OH) C22:1            | 0                                     | 0                                    | <LOD                 | 5.0                 |
| SM (OH) C22:2            | 0                                     | 0                                    | <LOD                 | 4.9                 |
| SM (OH) C24:1            | 0                                     | 0                                    | <LOD                 | 6.0                 |
| <b>Hexose</b>            |                                       |                                      |                      |                     |
| Hexose                   | 0                                     | 2.03                                 | <LOQ (< 1500 µmol/L) | 3.7                 |

<sup>1</sup>Metabolites in gray were excluded from the statistical analysis because more than 20% or the measures were outside the measurable range.

<sup>2</sup>Limit of detection (LOD) is applicable to acylcarnitines, glycerophospholipids, sphingolipids. Limit of quantification (LOQ) is applicable to amino acids, biogenic amines and hexose. No results was reported to be higher than the upper limit of quantification.

<sup>3</sup>Missing values were defined as unmeasured metabolite in samples because of technical problems.

<sup>4</sup>Mean intra- and inter-batch coefficients of variation (CVs) based on two quality control samples measured in duplicate in each batch.

Supplementary Table 2. Description of metabolites concentrations by case-control status

| Metabolites                 | Cases                               | Controls                            |
|-----------------------------|-------------------------------------|-------------------------------------|
|                             | N=1624                              | N=1624                              |
|                             | Geometric mean (95% CI) -<br>μmol/L | Geometric mean (95% CI) -<br>μmol/L |
| <b>Acylcarnitines</b>       |                                     |                                     |
| C0                          | 28.75 (28.43-29.07)                 | 28.65 (28.33-28.97)                 |
| C2                          | 4.57 (4.48-4.65)                    | 4.38 (4.30-4.46)                    |
| C3                          | 0.27 (0.26-0.27)                    | 0.27 (0.26-0.27)                    |
| C4                          | 0.15 (0.14-0.15)                    | 0.15 (0.14-0.15)                    |
| C5                          | 0.10 (0.09-0.10)                    | 0.10 (0.09-0.10)                    |
| C14:1                       | 0.06 (0.06-0.06)                    | 0.06 (0.06-0.06)                    |
| C16                         | 0.10 (0.09-0.10)                    | 0.09 (0.09-0.10)                    |
| C18:1                       | 0.10 (0.10-0.11)                    | 0.10 (0.10-0.10)                    |
| <b>Amino acids</b>          |                                     |                                     |
| Alanine                     | 308.30 (304.61-312.03)              | 311.99 (308.20-315.82)              |
| Arginine                    | 54.87 (53.59-56.19)                 | 56.16 (54.88-57.47)                 |
| Asparagine                  | 39.11 (38.65-39.58)                 | 39.97 (39.50-40.44)                 |
| Citrulline                  | 26.17 (25.82-26.52)                 | 26.59 (26.23-26.95)                 |
| Glutamine                   | 478.89 (474.29-483.53)              | 485.02 (480.38-489.70)              |
| Glutamate                   | 45.60 (44.07-47.19)                 | 45.80 (44.26-47.39)                 |
| Glycine                     | 201.74 (198.65-204.88)              | 207.59 (204.35-210.87)              |
| Histidine                   | 71.95 (71.39-72.52)                 | 72.80 (72.20-73.40)                 |
| Isoleucine                  | 58.50 (57.67-59.35)                 | 58.76 (57.90-59.63)                 |
| Leucine                     | 108.31 (106.94-109.70)              | 108.61 (107.19-110.04)              |
| Lysine                      | 180.44 (178.34-182.56)              | 183.83 (181.74-185.94)              |
| Methionine                  | 19.36 (19.12-19.61)                 | 19.54 (19.28-19.80)                 |
| Ornithine                   | 73.26 (71.96-74.58)                 | 74.17 (72.84-75.53)                 |
| Phenylalanine               | 54.72 (54.21-55.23)                 | 54.86 (54.34-55.38)                 |
| Proline                     | 155.81 (153.43-158.23)              | 158.62 (156.10-161.19)              |
| Serine                      | 91.38 (90.34-92.43)                 | 92.31 (91.25-93.39)                 |
| Threonine                   | 106.52 (105.20-107.86)              | 108.38 (107.05-109.73)              |
| Tryptophane                 | 51.50 (51.02-51.99)                 | 51.75 (51.28-52.23)                 |
| Tyrosine                    | 58.99 (58.22-59.78)                 | 58.91 (58.12-59.70)                 |
| Valine                      | 184.04 (182.12-185.97)              | 184.01 (182.10-185.93)              |
| <b>Biogenic amines</b>      |                                     |                                     |
| ADMA                        | 0.38 (0.38-0.38)                    | 0.38 (0.38-0.39)                    |
| Creatinine                  | 54.07 (53.63-54.51)                 | 54.25 (53.78-54.73)                 |
| Kynurenine                  | 1.89 (1.87-1.92)                    | 1.91 (1.88-1.93)                    |
| SDMA                        | 0.35 (0.35-0.35)                    | 0.35 (0.35-0.35)                    |
| Taurine                     | 49.48 (48.59-50.39)                 | 49.42 (48.51-50.35)                 |
| t4-OH-Pro                   | 7.76 (7.59-7.92)                    | 7.71 (7.55-7.88)                    |
| <b>Glycerophospholipids</b> |                                     |                                     |
| PC aa C28:1                 | 2.34 (2.31-2.37)                    | 2.34 (2.31-2.37)                    |
| PC aa C30:0                 | 3.22 (3.16-3.27)                    | 3.24 (3.19-3.29)                    |
| PC aa C32:0                 | 13.48 (13.34-13.61)                 | 13.55 (13.41-13.68)                 |
| PC aa C32:1                 | 15.06 (14.69-15.44)                 | 14.96 (14.58-15.34)                 |
| PC aa C32:2                 | 4.24 (4.16-4.32)                    | 4.33 (4.24-4.41)                    |
| PC aa C32:3                 | 0.59 (0.58-0.59)                    | 0.59 (0.59-0.60)                    |
| PC aa C34:1                 | 178.36 (176.52-180.22)              | 178.42 (176.57-180.28)              |
| PC aa C34:2                 | 269.59 (266.86-272.35)              | 271.29 (268.59-274.01)              |
| PC aa C34:3                 | 15.27 (15.03-15.52)                 | 15.52 (15.27-15.77)                 |
| PC aa C34:4                 | 1.78 (1.75-1.81)                    | 1.81 (1.78-1.84)                    |
| PC aa C36:0                 | 1.86 (1.82-1.89)                    | 1.85 (1.81-1.88)                    |
| PC aa C36:1                 | 42.48 (41.96-43.01)                 | 42.99 (42.46-43.52)                 |
| PC aa C36:2                 | 189.43 (187.79-191.09)              | 191.91 (190.28-193.57)              |
| PC aa C36:3                 | 117.37 (116.26-118.49)              | 119.62 (118.53-120.72)              |
| PC aa C36:4                 | 151.52 (149.99-153.07)              | 151.57 (149.99-153.17)              |

| Metabolites    | Cases                               | Controls                            |
|----------------|-------------------------------------|-------------------------------------|
|                | N=1624                              | N=1624                              |
|                | Geometric mean (95% CI) -<br>µmol/L | Geometric mean (95% CI) -<br>µmol/L |
| PC aa C36:5    | 20.44 (19.92-20.98)                 | 20.09 (19.58-20.61)                 |
| PC aa C36:6    | 0.99 (0.97-1.01)                    | 0.99 (0.97-1.01)                    |
| PC aa C38:0    | 2.17 (2.14-2.20)                    | 2.19 (2.16-2.22)                    |
| PC aa C38:3    | 36.80 (36.34-37.27)                 | 37.43 (36.97-37.89)                 |
| PC aa C38:4    | 76.85 (75.95-77.76)                 | 77.43 (76.54-78.33)                 |
| PC aa C38:5    | 40.20 (39.70-40.70)                 | 40.34 (39.84-40.84)                 |
| PC aa C38:6    | 68.00 (66.97-69.06)                 | 67.24 (66.20-68.31)                 |
| PC aa C40:2    | 0.20 (0.20-0.20)                    | 0.20 (0.20-0.21)                    |
| PC aa C40:3    | 0.36 (0.36-0.37)                    | 0.37 (0.36-0.37)                    |
| PC aa C40:4    | 2.13 (2.10-2.16)                    | 2.16 (2.14-2.19)                    |
| PC aa C40:5    | 5.47 (5.40-5.55)                    | 5.53 (5.46-5.61)                    |
| PC aa C40:6    | 19.53 (19.22-19.85)                 | 19.44 (19.13-19.77)                 |
| PC aa C42:0    | 0.34 (0.34-0.35)                    | 0.35 (0.34-0.35)                    |
| PC aa C42:1    | 0.16 (0.16-0.17)                    | 0.17 (0.16-0.17)                    |
| PC aa C42:2    | 0.14 (0.14-0.14)                    | 0.14 (0.14-0.14)                    |
| PC aa C42:4    | 0.10 (0.10-0.10)                    | 0.10 (0.10-0.10)                    |
| PC aa C42:5    | 0.20 (0.20-0.20)                    | 0.20 (0.20-0.20)                    |
| PC aa C42:6    | 0.30 (0.29-0.30)                    | 0.30 (0.29-0.30)                    |
| PC ae C30:0    | 0.27 (0.27-0.28)                    | 0.28 (0.27-0.28)                    |
| PC ae C30:2    | 0.08 (0.08-0.08)                    | 0.08 (0.08-0.08)                    |
| PC ae C32:1    | 2.61 (2.58-2.64)                    | 2.60 (2.57-2.63)                    |
| PC ae C32:2    | 0.75 (0.74-0.76)                    | 0.75 (0.74-0.76)                    |
| PC ae C34:0    | 1.51 (1.49-1.53)                    | 1.53 (1.51-1.55)                    |
| PC ae C34:1    | 9.61 (9.51-9.71)                    | 9.67 (9.57-9.77)                    |
| PC ae C34:2    | 11.32 (11.20-11.45)                 | 11.56 (11.43-11.70)                 |
| PC ae C34:3    | 7.50 (7.40-7.60)                    | 7.62 (7.52-7.72)                    |
| PC ae C36:0    | 0.73 (0.72-0.74)                    | 0.73 (0.73-0.74)                    |
| PC ae C36:1    | 7.82 (7.72-7.92)                    | 7.87 (7.77-7.97)                    |
| PC ae C36:2    | 14.01 (13.85-14.17)                 | 14.29 (14.13-14.45)                 |
| PC ae C36:3    | 7.12 (7.05-7.19)                    | 7.30 (7.22-7.37)                    |
| PC ae C36:4    | 14.00 (13.85-14.15)                 | 14.20 (14.04-14.35)                 |
| PC ae C36:5    | 9.42 (9.31-9.53)                    | 9.43 (9.32-9.54)                    |
| PC ae C38:0    | 1.82 (1.79-1.84)                    | 1.82 (1.79-1.85)                    |
| PC ae C38:2    | 1.68 (1.66-1.71)                    | 1.73 (1.70-1.75)                    |
| PC ae C38:3    | 3.73 (3.68-3.78)                    | 3.80 (3.75-3.85)                    |
| PC ae C38:4    | 10.31 (10.21-10.41)                 | 10.43 (10.34-10.54)                 |
| PC ae C38:5    | 12.80 (12.67-12.93)                 | 12.97 (12.84-13.10)                 |
| PC ae C38:6    | 6.00 (5.93-6.07)                    | 6.03 (5.95-6.10)                    |
| PC ae C40:1    | 0.90 (0.89-0.91)                    | 0.91 (0.90-0.93)                    |
| PC ae C40:2    | 1.37 (1.35-1.39)                    | 1.37 (1.36-1.39)                    |
| PC ae C40:3    | 0.79 (0.78-0.80)                    | 0.80 (0.79-0.81)                    |
| PC ae C40:4    | 1.59 (1.57-1.61)                    | 1.62 (1.60-1.63)                    |
| PC ae C40:5    | 2.55 (2.52-2.59)                    | 2.57 (2.54-2.60)                    |
| PC ae C40:6    | 3.56 (3.52-3.61)                    | 3.59 (3.54-3.63)                    |
| PC ae C42:1    | 0.23 (0.23-0.23)                    | 0.23 (0.23-0.24)                    |
| PC ae C42:2    | 0.35 (0.34-0.35)                    | 0.35 (0.35-0.36)                    |
| PC ae C42:3    | 0.51 (0.50-0.52)                    | 0.52 (0.51-0.52)                    |
| PC ae C42:4    | 0.49 (0.49-0.50)                    | 0.50 (0.49-0.50)                    |
| PC ae C42:5    | 1.31 (1.30-1.33)                    | 1.32 (1.31-1.33)                    |
| PC ae C44:3    | 0.08 (0.08-0.08)                    | 0.08 (0.08-0.08)                    |
| PC ae C44:4    | 0.20 (0.20-0.20)                    | 0.20 (0.20-0.20)                    |
| PC ae C44:5    | 0.81 (0.80-0.82)                    | 0.80 (0.79-0.81)                    |
| PC ae C44:6    | 0.62 (0.61-0.63)                    | 0.62 (0.61-0.63)                    |
| lysoPC a C16:0 | 76.32 (75.34-77.32)                 | 76.90 (75.92-77.89)                 |
| lysoPC a C16:1 | 2.28 (2.25-2.32)                    | 2.29 (2.25-2.32)                    |

| Metabolites                                                                         | Cases                               | Controls                            |
|-------------------------------------------------------------------------------------|-------------------------------------|-------------------------------------|
|                                                                                     | N=1624                              | N=1624                              |
|                                                                                     | Geometric mean (95% CI) -<br>µmol/L | Geometric mean (95% CI) -<br>µmol/L |
| lysoPC a C17:0                                                                      | 1.55 (1.52-1.57)                    | 1.57 (1.54-1.60)                    |
| lysoPC a C18:0                                                                      | 22.89 (22.52-23.27)                 | 23.35 (22.97-23.74)                 |
| lysoPC a C18:1                                                                      | 15.67 (15.42-15.91)                 | 15.88 (15.63-16.13)                 |
| lysoPC a C18:2                                                                      | 21.75 (21.37-22.14)                 | 22.41 (22.02-22.80)                 |
| lysoPC a C20:3                                                                      | 1.64 (1.61-1.66)                    | 1.67 (1.65-1.70)                    |
| lysoPC a C20:4                                                                      | 4.30 (4.24-4.36)                    | 4.32 (4.25-4.38)                    |
| lysoPC a C24:0                                                                      | 0.11 (0.11-0.11)                    | 0.11 (0.11-0.11)                    |
| lysoPC a C28:1                                                                      | 0.31 (0.30-0.31)                    | 0.31 (0.31-0.32)                    |
| <b>Sphingolipids</b>                                                                |                                     |                                     |
| SM C16:0                                                                            | 84.24 (83.56-84.93)                 | 84.72 (84.03-85.41)                 |
| SM C16:1                                                                            | 12.30 (12.18-12.42)                 | 12.33 (12.21-12.46)                 |
| SM C18:0                                                                            | 17.01 (16.83-17.20)                 | 17.08 (16.89-17.26)                 |
| SM C18:1                                                                            | 8.54 (8.44-8.63)                    | 8.58 (8.49-8.68)                    |
| SM C20:2                                                                            | 0.39 (0.39-0.40)                    | 0.41 (0.40-0.42)                    |
| SM C24:0                                                                            | 11.22 (11.10-11.34)                 | 11.37 (11.25-11.49)                 |
| SM C24:1                                                                            | 25.41 (25.14-25.67)                 | 25.31 (25.05-25.57)                 |
| SM C26:0                                                                            | 0.09 (0.08-0.09)                    | 0.09 (0.09-0.09)                    |
| SM C26:1                                                                            | 0.18 (0.18-0.19)                    | 0.18 (0.18-0.19)                    |
| SM (OH) C14:1                                                                       | 5.03 (4.97-5.09)                    | 5.04 (4.98-5.11)                    |
| SM (OH) C16:1                                                                       | 2.73 (2.70-2.77)                    | 2.75 (2.71-2.78)                    |
| SM (OH) C22:1                                                                       | 8.58 (8.49-8.68)                    | 8.74 (8.65-8.84)                    |
| SM (OH) C22:2                                                                       | 7.07 (6.99-7.14)                    | 7.15 (7.07-7.22)                    |
| SM (OH) C24:1                                                                       | 0.71 (0.70-0.72)                    | 0.72 (0.71-0.73)                    |
| <b>Sugars</b>                                                                       |                                     |                                     |
| Hexose                                                                              | 3978.9 (3918.2-4040.6)              | 3915.1 (3852.0-3979.2)              |
| Abbreviations: CI, confidence interval; PC, phosphatidylcholine; SM, sphingomyelin. |                                     |                                     |

# Supplementary Figure 1. Age-adjusted partial correlations between metabolites among controls (N=1624)

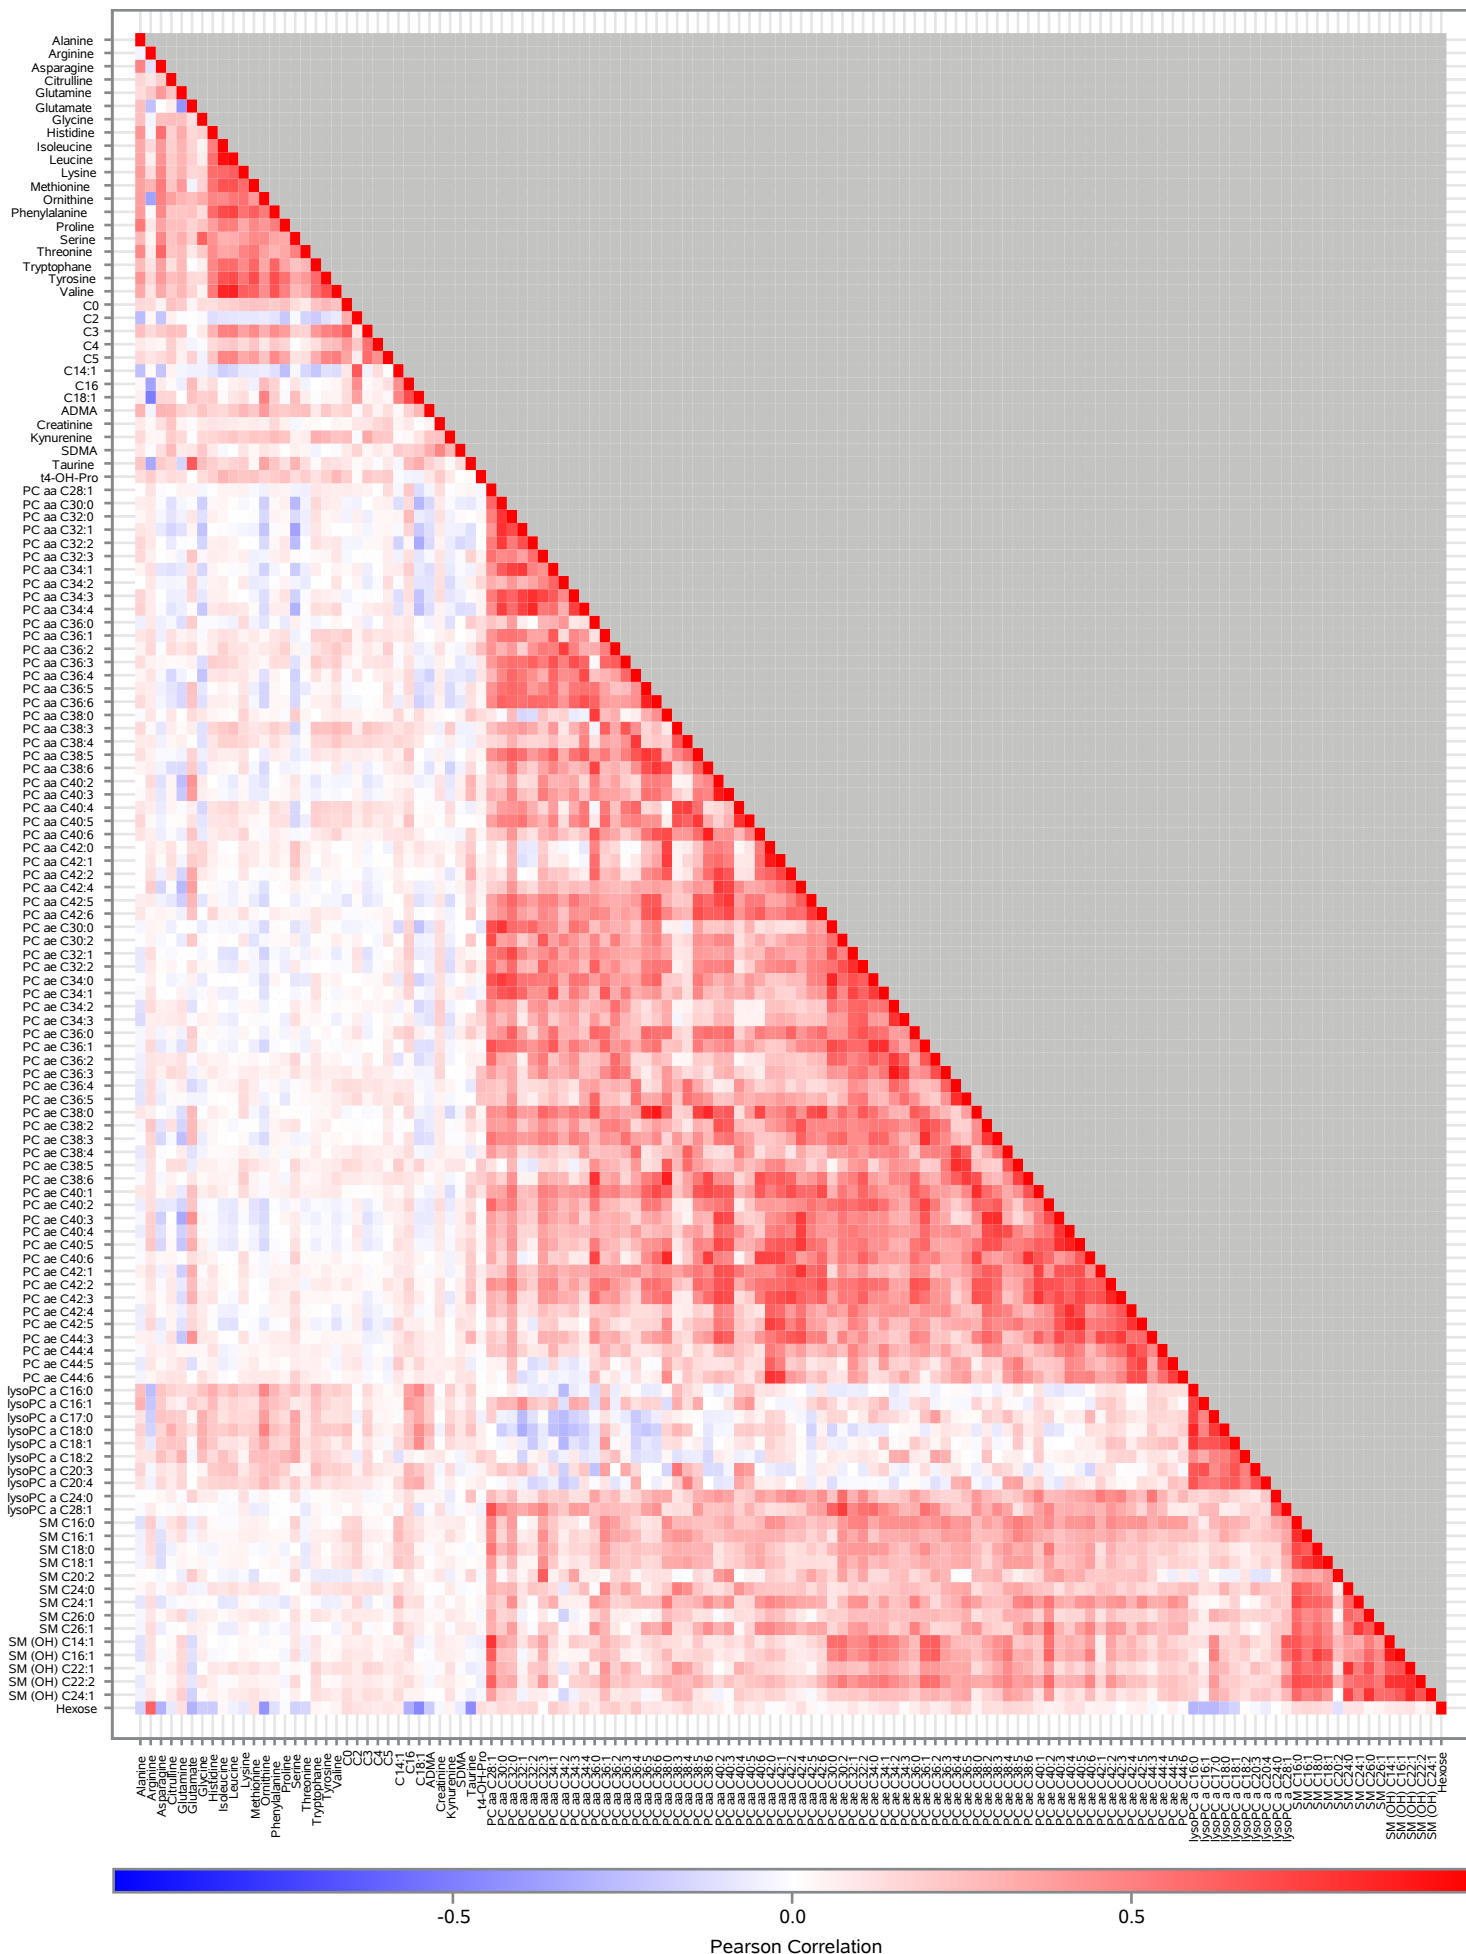

Supplementary Figure 2. Permutation-based stepdown minP adjusted P-values for association between metabolites and risk of breast cancer, by subtype

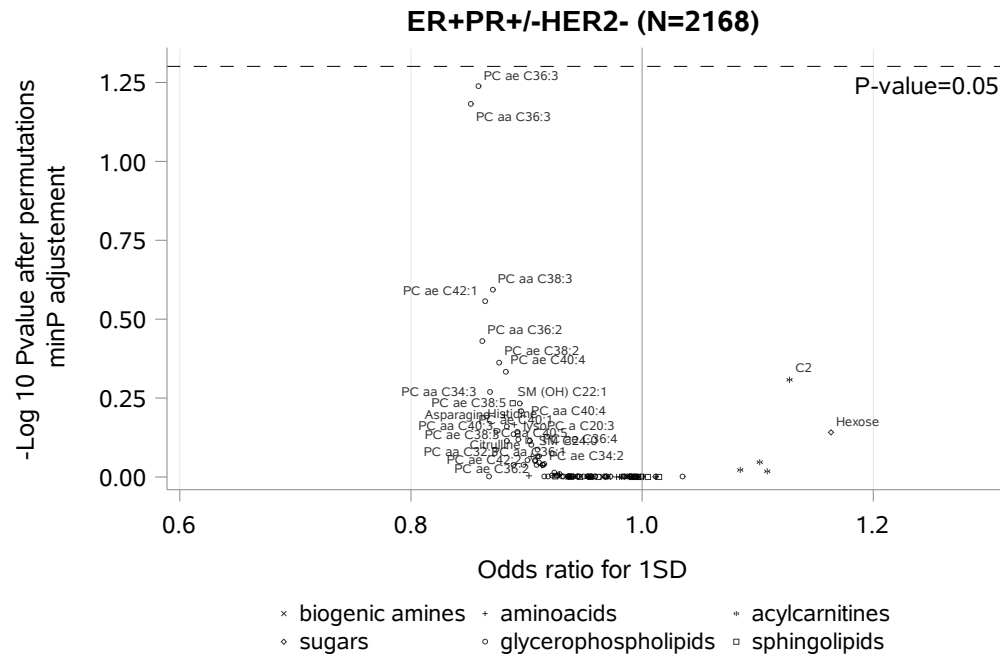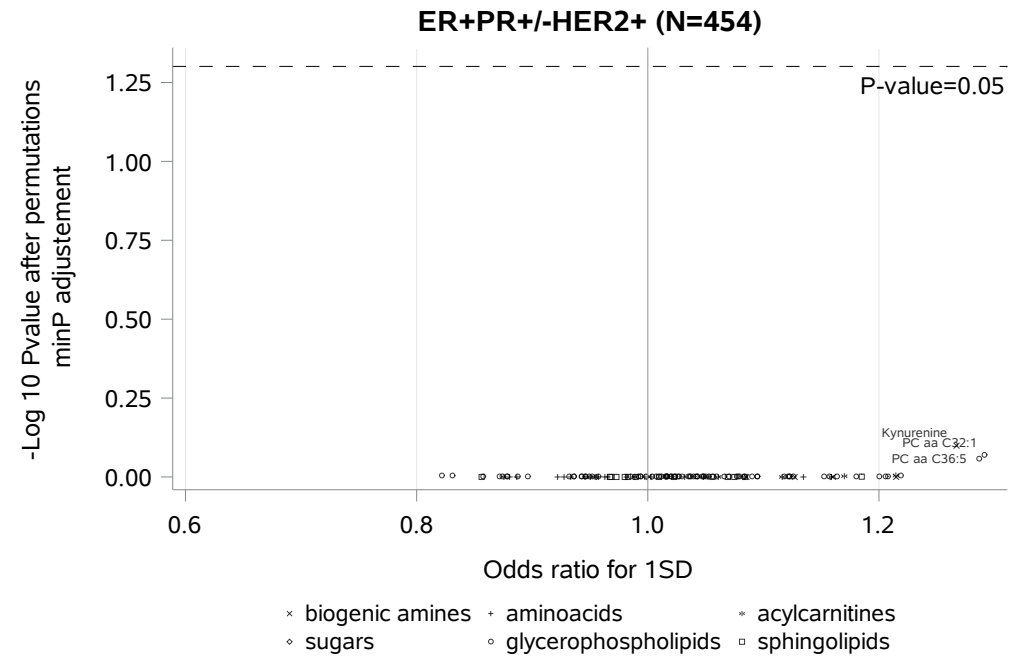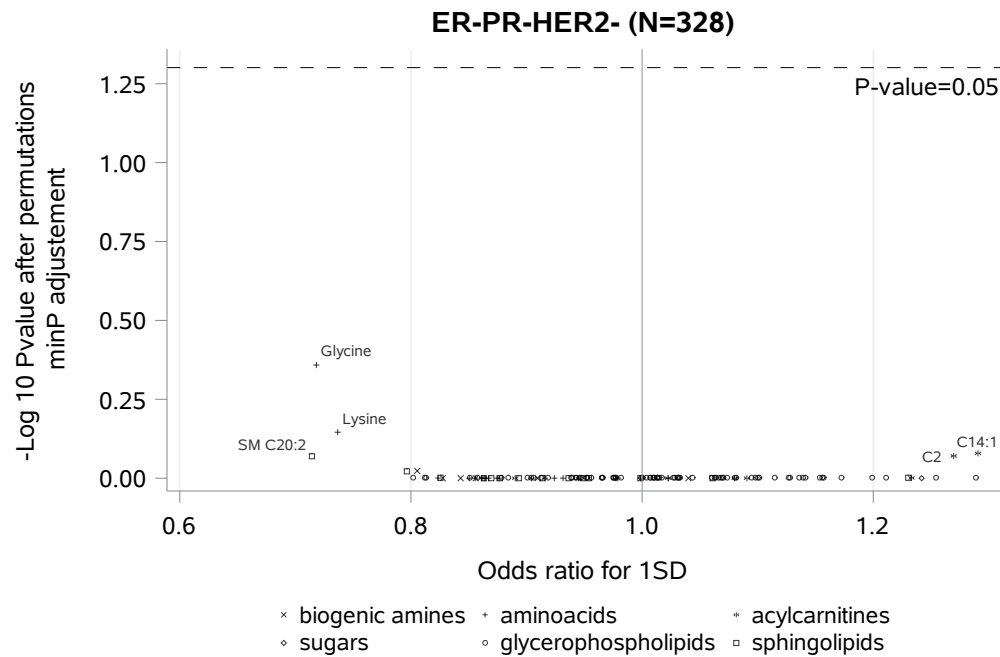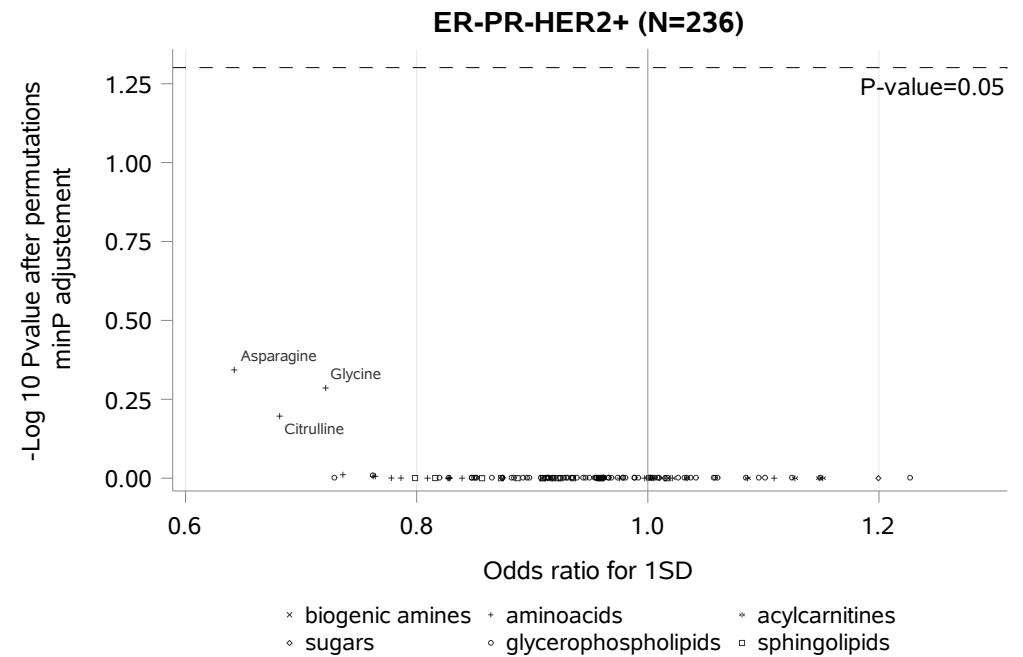

Supplement: 12916_2019_1408_MOESM1_ESM.pdf [file 12916_2019_1408_MOESM1_ESM.pdf]
